# Supplementary material for: Global Assessment of Climate Change-Attributed Loss and Damage
Source: Research Square preprint supplement (doi:10.21203/rs.3.rs-7149291/v1), 2025-08-07

Annex A: Demographic Data Imputation Methodology

# Introduction

This annex provides a detailed description of the methodology used to preprocess and impute demographic and macroeconomic data from the World Development Indicators (WDI) database for cross-country analysis of climate change-induced disaster loss and damage. The workflow ensures complete and comparable datasets across indicators and years, enabling population-normalized and PPP-adjusted economic analysis.

# Data Sources and Structure

The raw data were obtained from the World Bank WDI dataset (WDICSV.csv), covering multiple indicators for all available countries from 1960 to 2023. Data were converted into a long-format panel with the following columns:

- Country Name
- Country Code
- Indicator Name
- Indicator Code
- Year
- Value

The analysis focused on the following indicators between 1980 and 2023:

Table : Summary of demographic indicators used and corresponding imputation strategy.

| **Indicator Code** | **Indicator Name** | **Variable Type** | **Imputation Strategy** |
| --- | --- | --- | --- |
| SP.POP.TOTL | Total Population | Static | Linear Interpolation with Fallback Mean |
| NY.GNP.MKTP.CD | Gross National Income (current US) | Dynamic | PCA + MICE (best method by R²) |
| AG.LND.TOTL.K2 | Land Area (sq. km) | Static | LOCF with Fallback Mean |
| PA.NUS.PPP | PPP Conversion Factor | PPP/FX | 2023-only: Direct/LOCF/Spline/Fixed |
| PA.NUS.FCRF | Official Exchange Rate (LCU per US$) | PPP/FX | 2023-only: Direct/LOCF/Spline/Fixed |

# Imputation Workflow

## Static Variables

Land area (AG.LND.TOTL.K2) and total population (SP.POP.TOTL) were treated as static or slowly varying indicators. Missing values were imputed using LOCF (for land area) and linear interpolation (for population). Where entire time series were missing, global means were used as fallback estimates.

## Dynamic Variables

Dynamic macroeconomic indicators (GDP and GNI) were imputed using a country-level, PCA-assisted multiple imputation procedure:

- **Filtering**: Countries with at least 10 observed values were selected.
- **Predictor Selection**: Variables with ≥40% non-missing values and sufficient variance were retained.
- **PCA Reduction**: Principal Component Analysis was used to reduce dimensionality and address multicollinearity.
- **Holdout Validation**: Ten observed values were masked and imputed using four methods: pmm, cart, rf, norm.
- **Method Selection**: The method with the highest R² score was chosen for final imputation.
- **Re-scaling**: Log-transformed imputations were back-transformed with expm1 and constrained to non-negative values.

## PPP and Exchange Rate (2023 Only)

PPP (PA.NUS.PPP) and FX (PA.NUS.FCRF) variables were treated as single-year (2023) requirements for economic normalization. A tiered strategy was adopted:

- **Direct Use**: Use 2023 value if valid.
- **LOCF**: Use 2022 value if 2023 missing.
- **Spline Interpolation**: Use multi-year spline if available.
- **LOCF Fallback**: Use last valid historical value.
- **USD Fixed Override**: Countries using USD were fixed at value = 1.0.

# Missing Value Imputation

Extent of missing values was assessed prior to imputation. The Pareto chart below shows the number of missing entries by indicator, sorted in descending order and accompanied by the cumulative proportion. To validate the accuracy of the imputation strategy for GDP and GNI, we conducted a holdout-based evaluation of four widely used imputation methods—predictive mean matching (pmm), classification and regression trees (cart), random forest (rf), and Bayesian normal regression (norm). For each country with sufficient data, ten observed values were randomly masked and imputed, and the R² score was computed between imputed and actual values.

The boxplots show that random forest (rf) and predictive mean matching (pmm) consistently outperform other methods across most countries for both GDP and GNI, with median R² values often exceeding 0.85. The norm and cart methods exhibit greater variability and lower average performance. This justifies our use of a dynamic model selection approach, where the best-performing method (based on R²) is chosen for each country-indicator pair. This strategy enhances the reliability of imputed values while maintaining transparency and replicability in the estimation process.


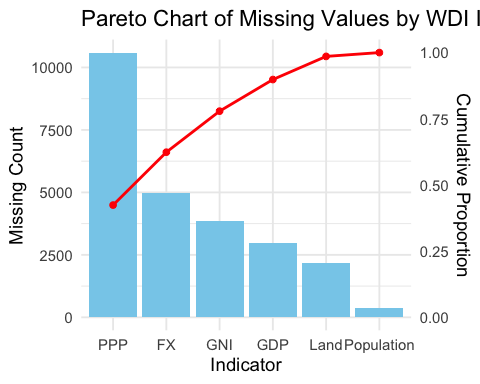


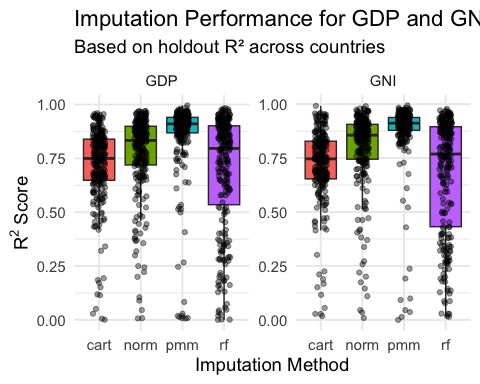

Supplement: Supplementary file 1 [file 8e375a5d7d4d0f7ba459b91e.docx]
