# Supplementary material for: Global Assessment of Climate Change-Attributed Loss and Damage
Source: Research Square preprint supplement (doi:10.21203/rs.3.rs-7149291/v1), 2025-08-07
Supplement: Supplementary file 2 [file e3a463656e4f5f0e7e011d43.docx]

# Annex B: Results (Extended)

ISO codes used in the paper represent the following countries: AFG: Afghanistan, AGO: Angola, AIA: United Kingdom (Anguilla), ALB: Albania, ANT: Netherlands (Former Netherlands Antilles), ARE: United Arab Emirates, ARG: Argentina, ARM: Armenia, ASM: United States (American Samoa), ATG: Antigua & Barbuda, AUS: Australia, AUT: Austria, AZE: Azerbaijan, AZO: Portugal (Azores), BDI: Burundi, BEL: Belgium, BEN: Benin, BFA: Burkina Faso, BGD: Bangladesh, BGR: Bulgaria, BHS: Bahamas, BIH: Bosnia & Herzegovina, BLM: France (Saint Barthélemy), BLR: Belarus, BLZ: Belize, BMU: United Kingdom (Bermuda), BOL: Bolivia, BRA: Brazil, BRB: Barbados, BRN: Brunei, BTN: Bhutan, BWA: Botswana, CAF: Central African Republic, CAN: Canada, CHE: Switzerland, CHL: Chile, CHN: China, CIV: Côte d’Ivoire, CMR: Cameroon, COD: Congo - Kinshasa, COG: Congo - Brazzaville, COK: Cook Islands, COL: Colombia, COM: Comoros, CPV: Cape Verde, CRI: Costa Rica, CUB: Cuba, CYM: United Kingdom (Cayman Islands), CYP: Cyprus, CZE: Czechia, DEU: Germany, DJI: Djibouti, DMA: Dominica, DNK: Denmark, DOM: Dominican Republic, DZA: Algeria, ECU: Ecuador, EGY: Egypt, ERI: Eritrea, ESP: Spain, EST: Estonia, ETH: Ethiopia, FIN: Finland, FJI: Fiji, FRA: France, FSM: Micronesia (Federated States of), GAB: Gabon, GBR: United Kingdom, GEO: Georgia, GHA: Ghana, GIN: Guinea, GLP: France (Guadeloupe), GMB: Gambia, GNB: Guinea-Bissau, GNQ: Equatorial Guinea, GRC: Greece, GRD: Grenada, GTM: Guatemala, GUF: France (French Guiana), GUM: United States (Guam), GUY: Guyana, HKG: Hong Kong SAR China, HND: Honduras, HRV: Croatia, HTI: Haiti, HUN: Hungary, IDN: Indonesia, IND: India, IRL: Ireland, IRN: Iran, IRQ: Iraq, ISL: Iceland, ISR: Israel, ITA: Italy, JAM: Jamaica, JOR: Jordan, JPN: Japan, KAZ: Kazakhstan, KEN: Kenya, KGZ: Kyrgyzstan, KHM: Cambodia, KIR: Kiribati, KNA: St. Kitts & Nevis, KOR: South Korea, KWT: Kuwait, LAO: Laos, LBN: Lebanon, LBR: Liberia, LBY: Libya, LCA: St. Lucia, LIE: Liechtenstein, LKA: Sri Lanka, LSO: Lesotho, LTU: Lithuania, LUX: Luxembourg, LVA: Latvia, MAC: Macao SAR China, MAR: Morocco, MDA: Moldova, MDG: Madagascar, MDV: Maldives, MEX: Mexico, MHL: Marshall Islands, MKD: North Macedonia, MLI: Mali, MLT: Malta, MMR: Myanmar (Burma), MNE: Montenegro, MNG: Mongolia, MNP: United States (Northern Mariana Islands), MOZ: Mozambique, MRT: Mauritania, MSR: United Kingdom (Montserrat), MTQ: France (Martinique), MUS: Mauritius, MWI: Malawi, MYS: Malaysia, NAM: Namibia, NCL: New Caledonia, NER: Niger, NGA: Nigeria, NIC: Nicaragua, NIU: New Zealand (Niue), NLD: Netherlands, NOR: Norway, NPL: Nepal, NZL: New Zealand, OMN: Oman, PAK: Pakistan, PAN: Panama, PER: Peru, PHL: Philippines, PLW: Palau, PNG: Papua New Guinea, POL: Poland, PRI: United States (Puerto Rico), PRK: North Korea, PRT: Portugal, PRY: Paraguay, PSE: Palestinian Territories, PYF: French Polynesia, QAT: Qatar, ROU: Romania, RUS: Russia, RWA: Rwanda, SAU: Saudi Arabia, SDN: Sudan, SEN: Senegal, SGP: Singapore, SHN: United Kingdom (Saint Helena, Ascension and Tristan da Cunha), SLB: Solomon Islands, SLE: Sierra Leone, SLV: El Salvador, SOM: Somalia, SRB: Serbia, SSD: South Sudan, STP: São Tomé & Príncipe, SUR: Suriname, SVK: Slovakia, SVN: Slovenia, SWE: Sweden, SWZ: Eswatini, SXM: Netherlands (Sint Maarten), SYC: Seychelles, SYR: Syria, TCA: United Kingdom (Turks and Caicos Islands), TCD: Chad, TGO: Togo, THA: Thailand, TJK: Tajikistan, TKL: New Zealand (Tokelau), TKM: Turkmenistan, TLS: Timor-Leste, TON: Tonga, TTO: Trinidad & Tobago, TUN: Tunisia, TUR: Turkey, TUV: Tuvalu, TWN: Taiwan, TZA: Tanzania, UGA: Uganda, UKR: Ukraine, URY: Uruguay, USA: United States, UZB: Uzbekistan, VCT: St. Vincent & Grenadines, VEN: Venezuela, VGB: United Kingdom (British Virgin Islands), VIR: United States (U.S. Virgin Islands), VNM: Vietnam, VUT: Vanuatu, WLF: France (Wallis and Futuna), WSM: Samoa, YEM: Yemen, ZAF: South Africa, ZMB: Zambia, ZWE: Zimbabwe

Table: Indicator wise summary of Loss and Damage from extreme events

| iso | Affected Population | Homelessness | Injury | Mortality | National Economic Loss (US$, ‘000) | Individual Economic Burden (US$/capita) | Confidence | Likelihood |
| --- | --- | --- | --- | --- | --- | --- | --- | --- |
| PER | 605,019 (328,891–767,787) | 0 (0–1,034) | 80,506 (80,433–80,555) | 244 (130–339) | 32,886 (0–75,169) | 1.04 (0.00–2.37) | Low | Virtually certain |
| MMR | 458,862 (186,808–592,613) | 2,280 (2,280–2,367) | 931 (931–931) | 3,895 (1,414–5,103) | 147,270 (146,689–148,239) | 2.90 (2.89–2.92) | Low | Likely |
| ITA | 4,841 (2,567–6,334) | 396 (396–396) | 14 (10–19) | 4,139 (4,120–4,151) | 968,334 (421,451–1,466,554) | 16.39 (7.20–24.76) | Low | As likely as not |
| FRA | 9,136 (0–24,437) | 22,530 (22,530–22,530) | 36 (9–56) | 2,363 (1,174–3,029) | 1,557,126 (681,993–2,594,093) | 23.73 (10.38–39.55) | Low | Virtually certain |
| ESP | 1,090 (0–2,120) |  | 11 (11–11) | 1,838 (916–2,303) | 258,465 (146,668–481,839) | 5.75 (3.34–10.54) | Low | Virtually certain |
| AFG | 2,284,890 (2,228,164–2,317,589) | 10,714 (6,480–13,251) | 289 (289–289) | 828 (491–1,072) | 0 (0–156) | 0.00 (0.00–0.01) | Low | Virtually certain |
| HTI | 329,884 (104,846–527,810) | 4,474 (0–7,882) | 472 (294–565) | 362 (125–493) | 12,605 (12,605–50,130) | 1.11 (1.11–4.76) | Low | As likely as not |
| DEU | 5,078 (0–11,606) |  | 97 (97–97) | 1,981 (1,963–1,992) | 1,775,903 (128,963–5,371,748) | 21.62 (1.56–65.43) | Low | Unlikely |
| BEL | 253 (0–578) | 0 (0–0) | 3 (3–3) | 727 (725–728) | 0 (0–86,756) | 0.00 (0.00–7.77) | Medium | Virtually certain |
| JPN | 104,423 (19,882–227,274) | 0 (0–139) | 27,571 (27,089–28,641) | 218 (179–337) | 4,046,417 (11,502–7,578,043) | 31.84 (0.09–59.62) | Low | Unlikely |
| PRI | 0 (0–16,055) | 9,211 (9,211–9,211) |  | 3 (0–5) | 692,029 (0–2,910,131) | 207.88 (0.00–874.16) | Low | Unlikely |
| SOM | 2,417,857 (248,028–3,522,655) | 551 (0–1,259) | 5 (5–5) | 44 (15–495) | 1,965 (1,965–1,965) | 0.13 (0.13–0.13) | Low | As likely as not |
| PRT | 7,079 (7,066–7,111) | 158 (158–158) | 107 (107–107) | 594 (589–597) | 315,305 (315,305–315,305) | 30.22 (30.22–30.22) | Low | Virtually certain |
| NLD |  |  | 0 (0–0) | 473 (472–474) | 103,672 (0–202,028) | 6.17 (0.00–12.03) | Low | As likely as not |
| PAK | 3,979,376 (340,064–6,353,904) | 236 (0–1,038) | 2,832 (2,071–3,391) | 627 (0–1,566) | 762,348 (487,196–910,781) | 3.61 (2.31–4.30) | Low | As likely as not |
| USA | 1,937,603 (12,623–3,701,469) | 6,663 (3,623–12,547) | 736 (62–1,463) | 115 (50–945) | 42,431,225 (11,282,341–185,105,990) | 133.53 (35.24–585.98) | Low | Very unlikely |
| MLT |  |  |  | 9 (9–9) |  |  | High | Virtually certain |
| GBR | 10,719 (0–18,519) | 0 (0–0) | 0 (0–0) | 1,054 (1,053–1,059) | 355,591 (0–1,219,269) | 5.64 (0.00–19.35) | Low | Unlikely |
| TUV | 640 (640–640) |  |  |  |  |  | Low | Virtually certain |
| MDV | 222 (222–222) |  |  |  |  |  | Low | Virtually certain |
| BGD | 829,066 (53,533–8,998,718) | 0 (0–6,149) | 240 (240–2,412) | 79 (19–614) | 50,484 (0–177,478) | 0.32 (0.00–1.13) | Low | Very unlikely |
| VNM | 821,411 (0–2,629,195) | 3,313 (0–33,825) | 106 (53–359) | 177 (0–534) | 461,531 (122,272–690,159) | 5.17 (1.34–7.75) | Low | Unlikely |
| MNE | 429 (429–429) |  |  | 6 (6–6) |  |  | High | Virtually certain |
| ROU | 9,755 (1,137–14,829) | 0 (0–437) | 29 (0–53) | 278 (89–376) | 0 (0–34,397) | 0.00 (0.00–1.67) | Low | As likely as not |
| BHS | 6,608 (6,608–6,608) |  |  | 12 (2–16) | 151,019 (0–364,529) | 410.34 (0.00–990.48) | Low | Unlikely |
| FIN | 0 (0–0) |  |  | 22 (22–22) |  |  | High | Virtually certain |
| LTU |  |  |  | 22 (0–33) | 0 (0–0) |  | Low | As likely as not |
| SYC | 557 (557–557) |  |  |  | 0 (0–0) |  | High | Virtually certain |
| AUT | 2,820 (2,820–2,820) |  | 6 (6–6) | 107 (105–109) | 0 (0–291,291) | 0.00 (0.00–35.15) | High | Virtually certain |
| SYR | 375,111 (375,111–375,111) |  | 168 (168–168) | 2 (2–2) |  |  | Low | Virtually certain |
